# Supplementary material for: A unique microwave effect on the microstructural modification of Cu/ZnO/Al2O3 catalysts for steam reforming of methanol
Source: Royal Society of Chemistry journal article supplement (doi:10.1039/b502997j), 2005-01-01
Supplement: b502997j.pdf [file b502997j.pdf]

## Electronic Supplementary Information for

### *“A unique microwave effect on the microstructural modification of Cu/ZnO/Al<sub>2</sub>O<sub>3</sub> catalysts for steam reforming of methanol”*

Xin-Rong Zhang, Lu-Cun Wang, Yong Cao\*, Wei-Lin Dai and Kang-Nian Fan\*  
*Department of Chemistry & Shanghai Key Laboratory of Molecular Catalysis and Innovative Materials, Fudan University, Shanghai 200433, P. R. China*

#### Experimental details

*Catalytic tests:* Catalytic experiments were performed at atmospheric pressure in a continuous flow fixed-bed microreactor consisting of a stainless-steel tube with an internal diameter of 10 mm and a coaxially centred thermocouple with its tip located in the middle of the bed. Prior to each experiment, the catalyst (0.45-0.55 mm, 0.5 g) was reduced at 250 °C for 6 h. The reaction was carried out under the following conditions: pressure: 0.1 MPa; reaction temperature: 250 °C; carrier gas of Ar: 60 mL·min<sup>-1</sup>; liquid feed (H<sub>2</sub>O/methanol = 1.1 molar ratio): 3.4 mL·h<sup>-1</sup>; WHSV = 5.8 h<sup>-1</sup>. Steady-state measurements were taken at least 6 h after beginning flow to the reactor, at which point the product composition was stable. Data were taken at 250 °C. The reaction products were analysed on-line by a GC (GC122, Shanghai Analysis) equipped with a thermal conductivity detector and two packed columns in series for products analysis. All experimental data were obtained under steady-state conditions.

*N<sub>2</sub>O titration:* The pulse titration technique was employed in our experiment. N<sub>2</sub> was used as the carrier gas and a thermal conduct detector was used to detect the amount of the consumption of N<sub>2</sub>O. The specific area of metallic copper was calculated from the total amount of N<sub>2</sub>O consumption by assuming the stoichiometry O:Cu = 1:2 and Cu surface atom density of 1.46×10<sup>19</sup> Cu atoms·m<sup>-2</sup>. The accuracy of the metallic copper surface area measurement was higher than 95%.

*X-ray diffraction:* In situ X-ray powder diffraction experiments performed on a Bruker AXS D8 Advance X-ray Diffractometer with Cu K $\alpha$ -radiation. Reduction of

the calcined or microwave processed Cu/ZnO/Al<sub>2</sub>O<sub>3</sub> precursors in 5 vol% H<sub>2</sub> in argon from room temperature to 250 °C at a ramping rate of 1 °C·min<sup>-1</sup> was carried out in a XRK-900 high temperature cell. *In situ* XRD patterns were recorded at 250 °C under simulated methanol steam reforming conditions (*c*(MeOH) ~ 5 vol%, *c*(H<sub>2</sub>O) ~5.5 vol% in 60 mL·min<sup>-1</sup> Ar) (25~80° 2θ, step width 0.02° 2θ, counting time: 1s/dp (dp = data point)).

X-ray powder diffraction patterns of the various Cu/ZnO/Al<sub>2</sub>O<sub>3</sub> catalysts under reaction conditions were analysed by the Pawley method (“full pattern refinement”).<sup>1,2</sup> A sum of pseudo-Voigt-profile functions and an appropriate background function were refined for the experimental patterns. The crystallite size and microstrain corresponding to the broadening of each *hkl* line was determined from the Lorentzian and Gaussian part of the individual profile functions. The specific copper surface areas as calculated from the crystallite size assuming a spherical particle, are in good agreement with the results of the N<sub>2</sub>O titration.

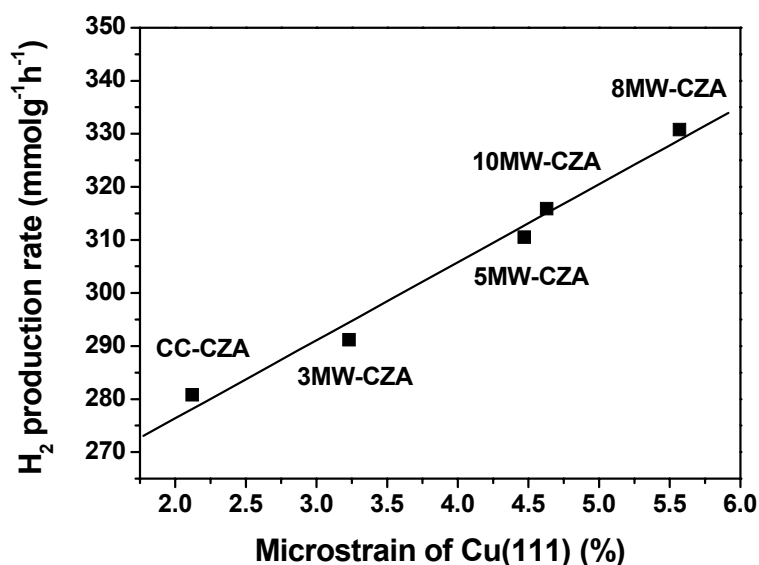

**Fig. 1S** A linear correlation of the microstrain of copper nanoparticles and the corresponding hydrogen production rate obtained from various CuO/ZnO/Al<sub>2</sub>O<sub>3</sub> oxide precursors processed by different time (0-10 min) of microwave irradiation.

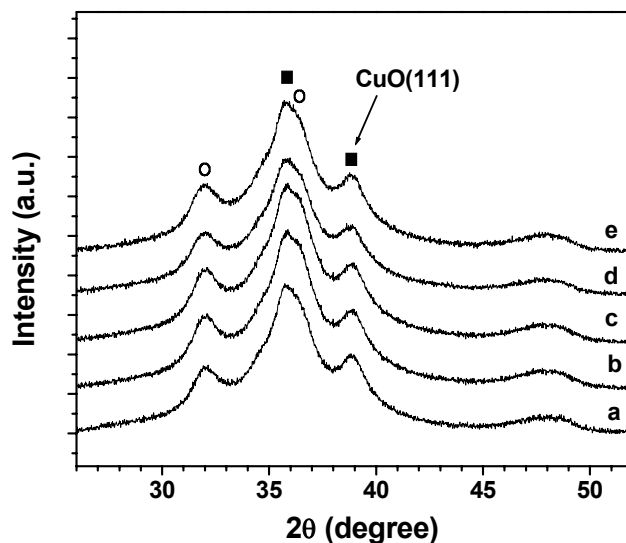

**Fig. 2S** XRD patterns of various Cu/ZnO/Al<sub>2</sub>O<sub>3</sub> oxide precursors (■, CuO phase; ○, ZnO phase) obtained by different time (0-10 min) of microwave irradiation: a) CC-PCZA, b) 3MW-PCZA, c) 5MW-PCZA, d) 8MW-PCZA, e) 10MW-PCZA.

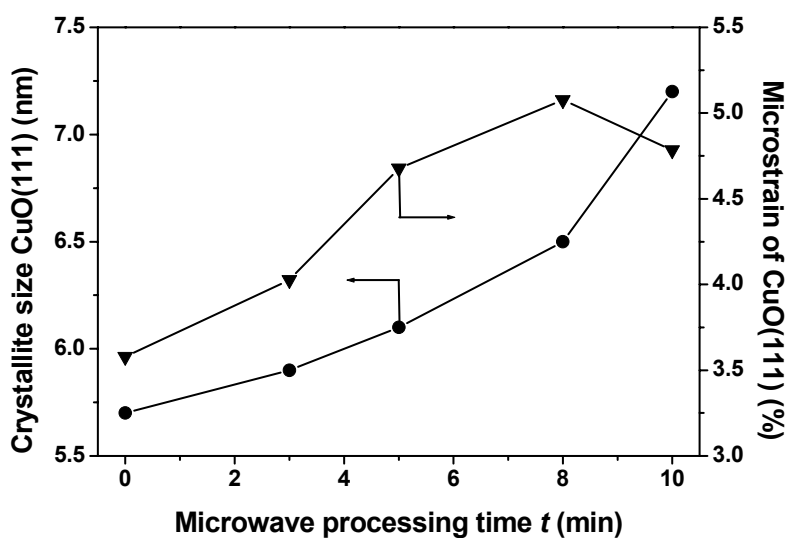

**Fig. 3S** Crystallite size  $d$  (●) and microstrain (▼) of the CuO nanoparticles (calculated from CuO111 line based on the data shown in Fig. 2S) as a function of microwave processing time  $t$  on the corresponding oxide precursors.

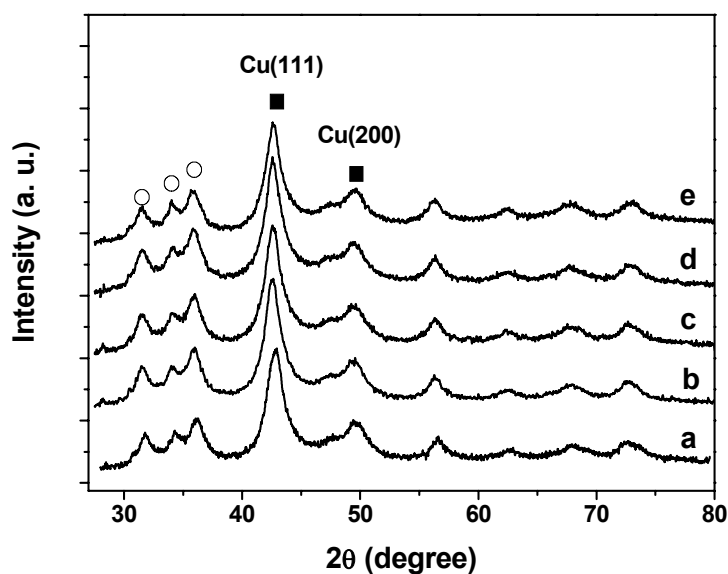

**Fig. 4S.** In situ XRD patterns of the working Cu/ZnO/Al<sub>2</sub>O<sub>3</sub> catalysts (■, Cu phase; ○, ZnO phase) obtained from the calcined samples via microwave pre-treatment for 0 to 10 min measured at 250 °C under methanol steam reforming conditions: a) CC-CZA, b) 3MW-CZA, c) 5MW-CZA, d) 8MW-CZA, e) 10MW-CZA.

## References

- 1□ G. S. Pawley, *J. Appl. Crystallogr.*, 1981, **14**, 357.
- 2□ B. L. Kniep, T. Ressler, A. Rabis, F. Girgsdies, M. Baenitz, F. Steglich, R. Schlögl, *Angew. Chem. Int. Ed.*, 2004, **43**, 112.
- 3□ Q. Sun, Y. L. Zhang, H. Y. Chen, J. F. Deng, D. Wu, S. Y. Chen, *J. Catal.*, 1997, **167**, 92.
- 4□ G. C. Chinchin, C. M. Hay, H. D. Vandervell, K. C. Waugh, *J. Catal.*, 1987, **103**, 79.
